# Supplementary material for: The Origins of Time-Delay in Template Biopolymerization Processes
Source: PLOS journal article supplement (doi:10.1371/journal.pcbi.1000726), 2010-04-01
Supplement: S4 (10.1371/journal.pcbi.1000726.s004) [file journal.pcbi.1000726.s004]

## Text S4 Equivalence with a Previously Proposed Delay Model

Using our non-dimensional scaling the delay model of [23] has the form

$$\eta(t) = \alpha(r_T - r_B) \left( \mu - \int_{t-\tau_I}^t \eta(t') dt' \right), \quad (55a)$$

$$\dot{r}_B = \eta(t) - \eta(t - \tau_E), \quad (55b)$$

applicable when the mRNA chains are empty at  $t = 0$ , for which  $\eta(t) \equiv 0$  for  $t < 0$ . Further, in that work the delays are defined as

$$\tau_E = \frac{N}{\beta}, \quad \tau_I = \frac{L}{\beta}. \quad (56)$$

In our PDE-delay model (Text S3),  $r_B$  may be given alternatively through the distribution  $z(s, t)$  as

$$r_B(t) = \mu \int_0^N z(s, t) ds, \quad (57)$$

or through the initiation rate  $\eta(t)$  as

$$r_B(t) = \int_{t_N(t)}^t \eta(t') dt', \quad (58)$$

equation S4.4 is obtained from Eq. S4.3 through a change of variables. For the special case of  $\beta_j$  and  $\gamma$  constant and equal to each other, we obtain

$$t_L(t) = t - \tau_I, \quad (59a)$$

$$t_N(t) = t - \tau_N, \quad (59b)$$

and

$$\dot{r}_B(t) = \eta(t) - \eta(t - \tau_E). \quad (60)$$

Using Eqs. S4.4 and S4.5a in 18

$$\eta(t) = \alpha(r_T - r_B) \left( \mu - \int_{t-\tau_I}^t \eta(t') dt' \right). \quad (61)$$

Eq. S4.7 is identical to S4.1a and Eq. S4.6 to S4.1b. Therefore, the formulations are completely equivalent, for the special case of  $\alpha$ ,  $r_T$ , and  $c_E$  constant. In our PDE formulation, the delays have a slightly different form than Eq. S4.2, as we take made a mean field approximation to account for the quasi-steady state packing in the ribosome fluxes; this has, in fact, the effect of improving the level of approximation.
